# Supplementary material for: Requirement of the FATC domain of protein kinase Tel1 for localization to DNA ends and target protein recognition
Source: PubMed Central journal article supplement — Mol Biol Cell. 2015 Oct 1;26(19):3480–8. doi: 10.1091/mbc.E15-05-0259 (PMC4591692; doi:10.1091/mbc.e15-05-0259), 2015-10-01
Supplement: supp_E15-05-0259v1_CombinedSupMats.pdf [file supp_E15-05-0259v1_CombinedSupMats.pdf]

# Supplemental Materials

*Molecular Biology of the Cell*

Ogi et al.

Table 1. Strains used in this study

| Strain  | Genotype                                                                    |
|---------|-----------------------------------------------------------------------------|
| KSC1709 | <i>MATa-inc TEL1-HA::TRP1 ADH4cs::HIS2</i>                                  |
| KSC3087 | <i>MATa-inc tel1-21-HA::TRP1::URA3 ADH4cs::HIS2</i>                         |
| KSC3088 | <i>MATa-inc tel1-22-HA::TRP1::URA3 ADH4cs::HIS2</i>                         |
| KSC3089 | <i>MATa-inc tel1-23-HA::TRP1::URA3 ADH4cs::HIS2</i>                         |
| KSC3549 | <i>MATa-inc tel1-ΔC-HA::TRP1::URA3 ADH4cs::HIS2</i>                         |
| KSC1751 | <i>MATa-inc tel1-KN-HA::TRP1::URA3 ADH4cs::HIS2</i>                         |
| KSC3633 | <i>MATa-inc TEL1-HA::TRP1 TEL2-FLAG::KanMX ADH4cs::HIS2</i>                 |
| KSC3634 | <i>MATa-inc tel1-ΔC-HA::TRP1::URA3 TEL2-FLAG::KanMX ADH4cs::HIS2</i>        |
| KSC1662 | <i>MATa-inc mec1-81 sml1Δ::LEU2 ADH4cs::HIS2</i>                            |
| KSC1564 | <i>MATa-inc mec1-81 tel1Δ::KanMX sml1Δ::LEU2 ADH4cs::HIS2</i>               |
| KSC3102 | <i>MATa-inc mec1-81 tel1-21::URA3 sml1Δ::LEU2 ADH4cs::HIS2</i>              |
| KSC3100 | <i>MATa-inc mec1-81 tel1-22::URA3 sml1Δ::LEU2 ADH4cs::HIS2</i>              |
| KSC3101 | <i>MATa-inc mec1-81 tel1-23::URA3 sml1Δ::LEU2 ADH4cs::HIS2</i>              |
| KSC3552 | <i>MATa-inc mec1-81 tel1-ΔC::URA3 sml1Δ::LEU2 ADH4cs::HIS2</i>              |
| KSC3635 | <i>MATa-inc mec1-81 TEL1-hy385::URA3 sml1Δ::LEU2 ADH4cs::HIS2</i>           |
| KSC3636 | <i>MATa-inc mec1-81 TEL1-hy385-21::URA3 sml1Δ::LEU2 ADH4cs::HIS2</i>        |
| KSC3637 | <i>MATa-inc mec1-81 TEL1-hy385-ΔC::URA3 sml1Δ::LEU2 ADH4cs::HIS2</i>        |
| KSC3140 | <i>MATa-inc mec1-81 sae2Δ::HphMX sml1Δ::LEU2 ADH4cs::HIS2</i>               |
| KSC3141 | <i>MATa-inc mec1-81 sae2Δ::HphMX tel1Δ::KanMX sml1Δ::LEU2 ADH4cs::HIS2</i>  |
| KSC3142 | <i>MATa-inc mec1-81 sae2Δ::HphMX tel1-21::URA3 sml1Δ::LEU2 ADH4cs::HIS2</i> |
| KSC3143 | <i>MATa-inc mec1-81 sae2Δ::HphMX tel1-22::URA3 sml1Δ::LEU2 ADH4cs::HIS2</i> |
| KSC3144 | <i>MATa-inc mec1-81 sae2Δ::HphMX tel1-23::URA3 sml1Δ::LEU2 ADH4cs::HIS2</i> |
| KSC3555 | <i>MATa-inc mec1-81 sae2Δ::HphMX tel1-ΔC::URA3 sml1Δ::LEU2 ADH4cs::HIS2</i> |
| KSC1057 | <i>MATa tel1Δ::KanMX</i>                                                    |
| KSC3378 | <i>MATa tel1-21::URA3</i>                                                   |
| KSC3379 | <i>MATa tel1-22::URA3</i>                                                   |
| KSC3377 | <i>MATa tel1-23::URA3</i>                                                   |
| KSC3556 | <i>MATa tel1-ΔC::URA3</i>                                                   |
| KSC1560 | <i>MATa-inc sml1Δ::LEU2 ADH4cs::HIS2</i>                                    |
| KSC1661 | <i>MATa-inc tel1Δ::KanMX sml1Δ::LEU2 ADH4cs::HIS2</i>                       |
| KSC1561 | <i>MATa-inc mec1Δ::LEU2 sml1Δ::LEU2 ADH4cs::HIS2</i>                        |
| KSC3629 | <i>MATa-inc tel1-21::URA3 sml1Δ::LEU2 ADH4cs::HIS2</i>                      |
| KSC3630 | <i>MATa-inc mec1Δ::LEU2 tel1-21::URA3 sml1Δ::LEU2 ADH4cs::HIS2</i>          |

All the strains are isogenic to KSC006 (*MATa, ade1, his2, leu2, trp1, ura3*).

**Table 2. List of oligonucleotides used in this study**

| <b>Name</b> | <b>Sequence (5' – 3')</b>                                                                     |
|-------------|-----------------------------------------------------------------------------------------------|
| KS948       | TGGGCACATCATCACATTGAGTTTGTACATTACTTTTCGTATTTCTATAAGTGTCA<br>CCATGAACGACAATTC                  |
| KS1140      | CAAGCCACGGATCCATCAAATTTGAGTGTTATATATATATGGGATGGTCACCTGCTG<br>CTTAATTGCTATGTGATTCTGGGTAGAAGATC |
| KS1845      | CAAGCCACGGATCCATCAAATTTGAGTGTTGCTGCTATGGGATGGTCACCTTTTT<br>ATTAATTGCTATGTGATTCTGGGTAGAAGATC   |
| KS1846      | CAAGCCACGGATCCATCAAATTTGAGTGTTATATATATATGGCTGCTTCACCTTTTTA<br>TTAATTGCTATGTGATTCTGGGTAGAAGATC |
| KS2807      | CTAGCGTACAAGATTTGATTCAGCAAGCCACGGATCCATCAAATTTGAGTTAATT<br>GCTATGTGATTCTGGGTAGAAGATC          |
| KS2789      | ATCATATAATTAGTTTCAGCCATAGAGGAAGGAATTTCTCTCAATAAAGGTCGTACG<br>CTGCAGGTCGAC                     |
| KS2790      | AAATAATATGCTGTGCATTAATACTAACGACGCTGACAGAGAACGCACTAATAC<br>GACTCACTATAGGG                      |
| KS3262      | TACGCAGTATTAAGAAAAGATTATGTCAAGGTGATGTGTGTTTTGGATATCTTAAA<br>ATGGGATCC                         |
